# Supplementary material for: Proteolysis of plasminogen activator inhibitor‐1 by Yersinia pestis remodulates the host environment to promote virulence
Source: PubMed Central journal article supplement — J Thromb Haemost. 2016 Aug 19;14(9):1833–43. doi: 10.1111/jth.13408 (PMC5053288; doi:10.1111/jth.13408), 2016-08-19

**Fig. S1.** Additional histological sections of formalin-fixed lungs stained with H&E from C57BL/6 or C57BL/6 *PAI-1*<sup>-/-</sup> mice inoculated with 10<sup>4</sup> CFU of *Y. pestis* or *Y. pestis*  $\Delta$ *pla*. Representative images of inflammatory lesions are shown. Scale bar of image (2.5X magnification) represents 100  $\mu$ m.

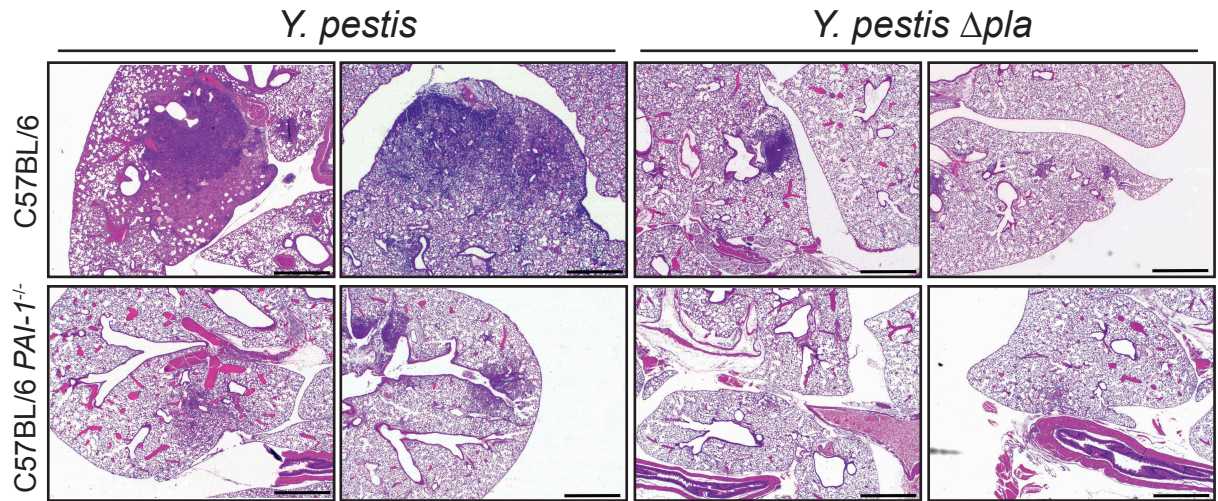

Supplement: JTH-14-1833-s001.pdf [file JTH-14-1833-s001.pdf]
